# Supplementary material
Source: PubMed Central journal article supplement (PMC3980568)
Supplement: NIHMS563439-supplement-Supplementary_data.pdf [file NIHMS563439-supplement-Supplementary_data.pdf]

## Supplementary Appendix

This appendix has been provided by the authors to give readers additional information about their work.

Supplement to: Reitz C, Mayeux R. *TREM2* and neurodegenerative disease. *N Engl J Med* 2013;369:1564-70. DOI: 10.1056/NEJMc1306509

## **Table of Content**

|                                                                           |          |
|---------------------------------------------------------------------------|----------|
| 1. Alzheimer's Disease Genetics Consortium Collaborators and Affiliations | pp. 2-8  |
| 2. Supplementary Data                                                     | pp. 9-12 |

## **Alzheimer's Disease Genetics Consortium Collaborators and Affiliations**

Marilyn S Albert,<sup>1</sup> Roger L Albin,<sup>2,3</sup> Liana G Apostolova,<sup>4</sup> Steven E Arnold,<sup>5</sup> Clinton T Baldwin,<sup>101</sup> Robert Barber,<sup>6</sup> Michael M Barmada,<sup>7</sup> Lisa L Barnes,<sup>89,102</sup> Thomas G Beach,<sup>8</sup> Gary W Beecham,<sup>9,10</sup> Duane Beekly,<sup>11</sup> David A Bennett,<sup>89,103</sup> Eileen H Bigio,<sup>12</sup> Thomas D Bird,<sup>13</sup> Deborah Blacker,<sup>14,15</sup> Bradley F Boeve,<sup>16</sup> James D Bowen,<sup>17</sup> Adam Boxer,<sup>18</sup> James R Burke,<sup>19</sup> Joseph D Buxbaum,<sup>20,21,104,105</sup> Goldie S. Byrd,<sup>106</sup> Guiqing Cai,<sup>20,21</sup> Nigel J Cairns,<sup>22</sup> Laura B Cantwell,<sup>92</sup> Chuanhai Cao,<sup>23</sup> Chris S Carlson,<sup>24</sup> Regina M Carney,<sup>25</sup> Steven L Carroll,<sup>26</sup> Helena C Chui,<sup>27</sup> David G Clark,<sup>28</sup> Paul K Crane,<sup>29</sup> David H Cribbs,<sup>30</sup> Elizabeth A Crocco,<sup>31</sup> Carlos Cruchaga,<sup>32</sup> Charles DeCarli,<sup>33</sup> Steven T DeKosky,<sup>34</sup> F. Yesim Demirci,<sup>7</sup> Malcolm Dick,<sup>35</sup> Nilufer Ertekin-Taner,<sup>16,100</sup> Denis Evans,<sup>107</sup> Kelley M Faber,<sup>36</sup> M. Daniele Fallin,<sup>108</sup> Kenneth B Fallon,<sup>26</sup> Lindsay A Farrer,<sup>62,101,109,110,111</sup> Martin R Farlow,<sup>37</sup> Steven Ferris,<sup>38</sup> Matthew P Frosch,<sup>39</sup> Tatiana M Foroud,<sup>36</sup> Douglas R Galasko,<sup>40</sup> Mary Ganguli,<sup>41</sup> Marla Gearing,<sup>42,43</sup> Daniel H Geschwind,<sup>44</sup> Bernardino Ghetti,<sup>45</sup> John R Gilbert,<sup>9,10</sup> Sid Gilman,<sup>2</sup> Jonathan D Glass,<sup>46</sup> Rodney CP Go,<sup>112</sup> Alison M Goate,<sup>32</sup> Neill R Graff-Radford,<sup>16,100</sup> Robert C Green,<sup>113</sup> Patrick Griffith,<sup>114</sup> John H Growdon,<sup>47</sup> Jonathan L Haines,<sup>115</sup> Hakon Hakonarson,<sup>48</sup> Kathleen Hall,<sup>116</sup> Ronald L Hamilton,<sup>49</sup> Kara L Hamilton-Nelson,<sup>9</sup> Vahram Haroutunian,<sup>20,21,50</sup> Lindy E Harrell,<sup>28</sup> Elizabeth Head,<sup>51</sup> Hugh Hendrie,<sup>116,117,118</sup> Lawrence S Honig,<sup>52</sup> Christine M Hulette,<sup>53</sup> Bradley T Hyman,<sup>47</sup> Philip L De Jager,<sup>119,120,121</sup> Gail P Jarvik,<sup>54,55</sup> Gregory A Jicha,<sup>56</sup> Lee-Way Jin,<sup>57</sup> Gyungah Jun,<sup>101,109,110</sup> M. Ilyas Kamboh,<sup>7,122</sup> Anna Karydas,<sup>18</sup> John SK Kauwe,<sup>58</sup> Jeffrey A Kaye,<sup>59,60</sup> Ronald Kim,<sup>61</sup> Edward H Koo,<sup>40</sup> Neil W Kowall,<sup>62,63</sup> Joel H Kramer,<sup>64</sup> Patricia Kramer,<sup>59,65</sup> Walter A Kukull,<sup>123</sup> Frank M LaFerla,<sup>66</sup> James J Lah,<sup>46</sup> Rosalyn Lang-Walker,<sup>67</sup> Eric B Larson,<sup>29,124</sup> James B Leverenz,<sup>68</sup> Allan I Levey,<sup>46</sup> Ge Li,<sup>69</sup> Andrew P Lieberman,<sup>70</sup> Chiao-Feng Lin,<sup>92</sup> Mark Logue,<sup>101</sup> Oscar L. Lopez,<sup>122</sup> Kathryn L Lunetta,<sup>109</sup> Constantine G Lyketsos,<sup>71</sup> Wendy J Mack,<sup>72</sup> Jennifer J Manly,<sup>125,126</sup> Daniel C Marson,<sup>28</sup> Eden R Martin,<sup>9,10</sup> Frank Martiniuk,<sup>73</sup> Deborah C Mash,<sup>74</sup> Eliezer Masliah,<sup>40,75</sup> Wayne C McCormick,<sup>29</sup> Susan M McCurry,<sup>76</sup> Andrew N McDavid,<sup>24</sup> Ann C McKee,<sup>62,63</sup> Marsel Mesulam,<sup>77</sup> Bruce L Miller,<sup>18</sup> Carol A Miller,<sup>78</sup> Joshua W Miller,<sup>57</sup> Thomas J Montine,<sup>68</sup> John C

Morris,<sup>22,79</sup> Jill R Murrell,<sup>36</sup> Adam Naj,<sup>9,92</sup> Thomas O. Obisesan,<sup>127</sup> John M Olichney,<sup>33</sup> Joseph E Parisi,<sup>80,81</sup> Margaret A Pericak-Vance,<sup>9</sup> Elaine Peskind,<sup>69</sup> Ronald C Petersen,<sup>16</sup> Aimee Pierce,<sup>30</sup> Wayne W Poon,<sup>35</sup> Huntington Potter,<sup>23</sup> Joseph F Quinn,<sup>59</sup> Ashok Raj,<sup>23</sup> Towfique Raj,<sup>120</sup> Ruchita Rajbhandary,<sup>9</sup> Murray Raskind,<sup>69</sup> Eric M Reiman,<sup>82-85</sup> Barry Reisberg,<sup>38,86</sup> John M Ringman,<sup>4</sup> Erik D Roberson,<sup>28</sup> Howard J Rosen,<sup>18</sup> Roger N Rosenberg,<sup>87</sup> Mary Sano,<sup>20</sup> Andrew J Saykin,<sup>36,88</sup> Gerard D Schellenberg,<sup>92</sup> Julie A Schneider,<sup>89,90</sup> Lon S Schneider,<sup>27,91</sup> William W Seeley,<sup>18</sup> Amanda G Smith,<sup>23</sup> Joshua A Sonnen,<sup>68</sup> Salvatore Spina,<sup>45</sup> Robert A Stern,<sup>62</sup> Rudolph E Tanzi,<sup>47</sup> John Q Trojanowski,<sup>92</sup> Juan C Troncoso,<sup>93</sup> Debby W Tsuang,<sup>69</sup> Vivianna M Van Deerlin,<sup>92</sup> Linda J Van Eldik,<sup>94</sup> Badri Narayan Vardarajan,<sup>101,109,125,126</sup> Harry V Vinters,<sup>4,95</sup> Jean Paul Vonsattel,<sup>96</sup> Otto Valladares,<sup>92</sup> Li-San Wang,<sup>92</sup> Sandra Weintraub,<sup>77</sup> Kathleen A Welsh-Bohmer,<sup>19,97</sup> Jennifer Williamson,<sup>52</sup> Randall L Woltjer,<sup>98</sup> Clinton B Wright,<sup>99</sup> Steven G Younkin,<sup>100</sup> Chang-En Yu<sup>29</sup> and Lei Yu<sup>89</sup>

<sup>1</sup>Johns Hopkins University, Department of Neurology, Baltimore, Maryland <sup>2</sup>University of Michigan, Department of Neurology, Ann Arbor, Michigan <sup>3</sup>VA Ann Arbor Healthcare System (VAAHS), Geriatric Research, Education and Clinical Center (GRECC), Ann Arbor, Michigan <sup>4</sup>University of California Los Angeles, Department of Neurology, Los Angeles, California <sup>5</sup>University of Pennsylvania Perelman School of Medicine, Department of Psychiatry, Philadelphia, Pennsylvania <sup>6</sup>University of North Texas Health Science Center, Department of Pharmacology and Neuroscience, Fort Worth, Texas <sup>7</sup>University of Pittsburgh, Department of Human Genetics, Pittsburgh, Pennsylvania <sup>8</sup>Banner Sun Health Research Institute, Civin Laboratory for Neuropathology, Phoenix, Arizona <sup>9</sup>University of Miami, The John P. Hussman Institute for Human Genomics, Miami, Florida <sup>10</sup>University of Miami, Dr. John T. Macdonald Foundation Department of Human Genetics, Miami, Florida <sup>11</sup>University of Washington, National Alzheimer's Coordinating Center, Seattle, Washington <sup>12</sup>Northwestern University, Department of Pathology, Chicago, Illinois <sup>13</sup>University of Washington, Department of Neurology, Seattle,

Washington <sup>14</sup>Harvard School of Public Health, Department of Epidemiology, Boston, Massachusetts <sup>15</sup>Massachusetts General Hospital/Harvard Medical School, Department of Psychiatry, Boston, Massachusetts <sup>16</sup>Mayo Clinic, Department of Neurology, Rochester, Minnesota <sup>17</sup>Swedish Medical Center, Seattle, Washington <sup>18</sup>University of California San Francisco, Department of Neurology, San Francisco, California <sup>19</sup>Duke University, Department of Medicine, Durham, North Carolina <sup>20</sup>Mount Sinai School of Medicine, Department of Psychiatry, New York, New York <sup>21</sup>Mount Sinai School of Medicine, Department of Genetics and Genomics Sciences, New York, New York <sup>22</sup>Washington University, Department of Pathology and Immunology, St. Louis, Missouri <sup>23</sup>University of South Florida, USF Health Byrd Alzheimer's Institute, Tampa, Florida <sup>24</sup>Fred Hutchinson Cancer Research Center, Seattle, Washington <sup>25</sup>Vanderbilt University, Department of Psychiatry, Nashville, Tennessee <sup>26</sup>University of Alabama at Birmingham, Department of Pathology, Birmingham, Alabama <sup>27</sup>University of Southern California, Department of Neurology, Los Angeles, California <sup>28</sup>University of Alabama at Birmingham, Department of Neurology, Birmingham, Alabama <sup>29</sup>University of Washington, Department of Medicine, Seattle, Washington <sup>30</sup>University of California Irvine, Department of Neurology, Irvine, California <sup>31</sup>University of Miami, Department of Psychiatry and Behavioral Sciences, Miller School of Medicine, Miami, Florida <sup>32</sup>Washington University School of Medicine, Department of Psychiatry and Hope Center Program on Protein Aggregation and Neurodegeneration, St. Louis, Missouri <sup>33</sup>University of California Davis, Department of Neurology, Sacramento, California <sup>34</sup>University of Virginia School of Medicine, Charlottesville, Virginia <sup>35</sup>University of California Irvine, Institute for Memory Impairments and Neurological Disorders, Irvine, California <sup>36</sup>Indiana University, Department of Medical and Molecular Genetics, Indianapolis, Indiana <sup>37</sup>Indiana University, Department of Neurology, Indianapolis, Indiana <sup>38</sup>New York University, Department of Psychiatry, New York, New York <sup>39</sup>Massachusetts General Hospital, C.S. Kubik Laboratory for Neuropathology, Charlestown, Massachusetts <sup>40</sup>University of California San Diego, Department of Neurosciences, La Jolla, California

<sup>41</sup>University of Pittsburgh, Department of Psychiatry, Pittsburgh, Pennsylvania <sup>42</sup>Emory University, Department of Pathology and Laboratory Medicine, Atlanta, Georgia <sup>43</sup>Emory University, Emory Alzheimer's Disease Center, Atlanta, Georgia <sup>44</sup>University of California Los Angeles, Neurogenetics Program, Los Angeles, California <sup>45</sup>Indiana University, Department of Pathology and Laboratory Medicine, Indianapolis, Indiana <sup>46</sup>Emory University, Department of Neurology, Atlanta, Georgia <sup>47</sup>Massachusetts General Hospital/Harvard Medical School, Department of Neurology, Boston, Massachusetts <sup>48</sup>Children's Hospital of Philadelphia, Center for Applied Genomics, Philadelphia, Pennsylvania <sup>49</sup>University of Pittsburgh, Department of Pathology (Neuropathology), Pittsburgh, Pennsylvania <sup>50</sup>Mount Sinai School of Medicine, Friedman Brain Institute, New York, New York <sup>51</sup>University of Kentucky, Sanders-Brown Center on Aging, Department of Molecular and Biomedical Pharmacology, Lexington, Kentucky <sup>52</sup>Columbia University, Taub Institute on Alzheimer's Disease and the Aging Brain, Department of Neurology, New York, New York <sup>53</sup>Duke University, Department of Pathology, Durham, North Carolina <sup>54</sup>University of Washington, Department of Genome Sciences, Seattle, Washington <sup>55</sup>University of Washington, Department of Medicine (Medical Genetics), Seattle, Washington <sup>56</sup>University of Kentucky, Sanders-Brown Center on Aging, Departments of Neurology, Lexington, Kentucky <sup>57</sup>University of California Davis, Department of Pathology and Laboratory Medicine, Sacramento, California <sup>58</sup>Brigham Young University, Department of Biology, Provo, Utah <sup>59</sup>Oregon Health & Science University, Department of Neurology, Portland, Oregon <sup>60</sup>Portland Veterans Affairs Medical Center, Department of Neurology, Portland, Oregon <sup>61</sup>University of California Irvine, Department of Pathology and Laboratory Medicine, Irvine, California <sup>62</sup>Boston University, Department of Neurology, Boston, Massachusetts <sup>63</sup>Boston University, Department of Pathology, Boston, Massachusetts <sup>64</sup>University of California San Francisco, Department of Neuropsychology, San Francisco, California <sup>65</sup>Oregon Health & Science University, Department of Molecular & Medical Genetics, Portland, Oregon <sup>66</sup>University of California Irvine, Department of Neurobiology and Behavior, Irvine, California <sup>67</sup>North Carolina

A&T State University, Department of Biology, Greensboro, North Carolina <sup>68</sup>University of Washington, Department of Pathology, Seattle, Washington <sup>69</sup>University of Washington, Department of Psychiatry and Behavioral Sciences, Seattle, Washington <sup>70</sup>University of Michigan, Department of Pathology, Ann Arbor, Michigan <sup>71</sup>Johns Hopkins University, Department of Psychiatry, Baltimore, Maryland <sup>72</sup>University of Southern California, Department of Preventive Medicine, Los Angeles, California <sup>73</sup>New York University, Department of Medicine - Pulmonary, New York, New York <sup>74</sup>University of Miami, Department of Neurology, Miami, Florida <sup>75</sup>University of California San Diego, Department of Pathology, La Jolla, California <sup>76</sup>University of Washington, School of Nursing Northwest Research Group on Aging, Seattle, Washington <sup>77</sup>Northwestern University, Cognitive Neurology and Alzheimer's Disease Center, Chicago, Illinois <sup>78</sup>University of Southern California, Department of Pathology, Los Angeles, California <sup>79</sup>Washington University, Department of Neurology, St. Louis, Missouri <sup>80</sup>Mayo Clinic, Department of Anatomic Pathology, Rochester, Minnesota <sup>81</sup>Mayo Clinic, Department of Laboratory Medicine and Pathology, Rochester, Minnesota <sup>82</sup>Translational Genomics Research Institute, Neurogenomics Division, Phoenix, Arizona <sup>83</sup>Arizona Alzheimer's Consortium, Phoenix, Arizona <sup>84</sup>Banner Alzheimer's Institute, Phoenix, Arizona <sup>85</sup>University of Arizona, Department of Psychiatry, Phoenix, Arizona <sup>86</sup>New York University, Alzheimer's Disease Center, New York, New York <sup>87</sup>University of Texas Southwestern, Department of Neurology, Dallas, Texas <sup>88</sup>Indiana University, Department of Radiology and Imaging Sciences, Indianapolis, Indiana <sup>89</sup>Rush University Medical Center, Department of Neurological Sciences, Chicago, Illinois <sup>90</sup>Rush University Medical Center, Department of Pathology (Neuropathology), Chicago, Illinois <sup>91</sup>University of Southern California, Department of Psychiatry, Los Angeles, California <sup>92</sup>University of Pennsylvania Perelman School of Medicine, Department of Pathology and Laboratory Medicine, Philadelphia, Pennsylvania <sup>93</sup>Johns Hopkins University, Department of Pathology, Baltimore, Maryland <sup>94</sup>University of Kentucky, Sanders-Brown Center on Aging, Department of Anatomy and Neurobiology, Lexington, Kentucky <sup>95</sup>University of California Los

Angeles, Department of Pathology & Laboratory Medicine, Los Angeles, California <sup>96</sup>Columbia University, Taub Institute on Alzheimer's Disease and the Aging Brain, Department of Pathology, New York, New York <sup>97</sup>Duke University, Department of Psychiatry & Behavioral Sciences, Durham, North Carolina <sup>98</sup>Oregon Health & Science University, Department of Pathology, Portland, Oregon <sup>99</sup>University of Miami, Evelyn F. McKnight Brain Institute, Department of Neurology, Miller School of Medicine, Miami, Florida <sup>100</sup>Mayo Clinic, Department of Neuroscience, Jacksonville, Florida <sup>101</sup>Boston University, Department of Medicine (Genetics Program), Boston, Massachusetts <sup>102</sup>Rush University Medical Center, Department of Behavioral Sciences, Chicago, Illinois <sup>103</sup>Rush University Medical Center, Rush Alzheimer's Disease Center, Chicago, Illinois <sup>104</sup>Mount Sinai School of Medicine, Department of Neuroscience, New York, New York <sup>105</sup>Mount Sinai School of Medicine, Friedman Brain Institute, New York, New York <sup>106</sup>North Carolina A & T University, Department of Biology, Winston-Salem, North Carolina <sup>107</sup>Rush University Medical Center, Rush Institute for Healthy Aging, Department of Internal Medicine, Chicago, Illinois <sup>108</sup>Johns Hopkins University School of Public Health, Department of Epidemiology, Baltimore, Maryland <sup>109</sup>Boston University, Department of Biostatistics, Boston, Massachusetts <sup>110</sup>Boston University, Department of Ophthalmology, Boston, Massachusetts <sup>111</sup>Boston University, Department of Epidemiology, Boston, Massachusetts <sup>112</sup>University of Alabama at Birmingham, School of Public Health, Birmingham, Alabama <sup>113</sup>Brigham and Women's Hospital and Harvard Medical School, Division of Genetics, Department of Medicine and Partners Center for Personalized Genetic Medicine, Boston, Massachusetts <sup>114</sup>Meharry Medical College, Department of Neurology, Nashville, Tennessee <sup>115</sup>Vanderbilt University, Department of Molecular Physiology and Biophysics and Vanderbilt Center for Human Genetics Research, Nashville, Tennessee <sup>116</sup>Indiana University School of Medicine, Department of Psychiatry, Indianapolis, Indiana <sup>117</sup>Indiana University, Indiana University Center for Aging Research, Indianapolis, Indiana <sup>118</sup>Regenstrief Institute, Inc., Indianapolis, Indiana <sup>119</sup>Brigham & Women's Hospital, Program in Translational NeuroPsychiatric Genomics, Department of



Neurology, Boston, Massachusetts <sup>120</sup>Harvard Medical School, Boston, Massachusetts <sup>121</sup>The  
Broad Institute, Program in Medical & Population Genetics, Cambridge, Massachusetts  
<sup>122</sup>University of Pittsburgh, Alzheimer's Disease Research Center, Pittsburgh, Pennsylvania  
<sup>123</sup>University of Washington, National Alzheimer's Coordinating Center and Department of  
Epidemiology, Seattle, Washington <sup>124</sup>Group Health Research Institute, Seattle, Washington  
<sup>125</sup>Columbia University, The Taub Institute for Research on Alzheimer's Disease and the Aging  
Brain, New York, New York <sup>126</sup>Columbia University, The Gertrude H. Sergievsky Center, New  
York, New York <sup>127</sup>Howard University Hospital, Division of Geriatrics, Washington, District of  
Columbia

**Supplementary Data.** 154 SNPs assessed in VEGAS<sup>3</sup> analyses of the *TREM2* region (*TREM2* ± 20kb)

| CHR | BP       | SNP         |
|-----|----------|-------------|
| 6   | 41150861 | rs76660699  |
| 6   | 41150591 | rs9357347   |
| 6   | 41150530 | rs73429230  |
| 6   | 41150385 | rs73429229  |
| 6   | 41150267 | rs142323361 |
| 6   | 41150118 | rs137886100 |
| 6   | 41149675 | rs73429227  |
| 6   | 41149596 | rs115845676 |
| 6   | 41149576 | rs73429224  |
| 6   | 41149515 | rs181741226 |
| 6   | 41149125 | rs73429222  |
| 6   | 41149008 | rs60755019  |
| 6   | 41148980 | rs59913841  |
| 6   | 41148932 | rs114118696 |
| 6   | 41148840 | rs58051608  |
| 6   | 41148739 | rs189600297 |
| 6   | 41148461 | rs79495329  |
| 6   | 41148233 | rs151266707 |
| 6   | 41147988 | rs74437864  |
| 6   | 41147882 | rs73429215  |
| 6   | 41147589 | rs113017818 |
| 6   | 41147412 | rs113582625 |
| 6   | 41146425 | rs144859102 |
| 6   | 41145879 | rs150524125 |
| 6   | 41145525 | rs137961069 |
| 6   | 41145345 | rs74829631  |
| 6   | 41144826 | rs73429213  |
| 6   | 41144658 | rs6458197   |
| 6   | 41144364 | rs114333649 |
| 6   | 41144138 | rs143196424 |
| 6   | 41143425 | rs113803829 |
| 6   | 41143344 | rs73429210  |
| 6   | 41143299 | rs142426711 |
| 6   | 41143211 | rs76509602  |
| 6   | 41142650 | rs56138565  |
| 6   | 41142593 | rs115809832 |
| 6   | 41142458 | rs73429208  |
| 6   | 41142411 | rs151319393 |
| 6   | 41142164 | rs112875193 |

6 41142029 rs116184718  
6 41142013 rs73429205  
6 41141982 rs34375790  
6 41141963 rs113801282  
6 41141746 rs73427301  
6 41141585 rs114452795  
6 41140984 rs9394764  
6 41140840 rs138383060  
6 41140533 rs141781272  
6 41140481 rs148072029  
6 41140245 rs9471487  
6 41140244 rs189130114  
6 41140188 rs146977300  
6 41140156 rs141372335  
6 41139668 rs147068486  
6 41138413 rs73427296  
6 41138241 rs112453358  
6 41138049 rs12202176  
6 41138034 rs77271767  
6 41137347 rs113722164  
6 41137015 rs61655536  
6 41136820 rs188737563  
6 41136691 rs116811532  
6 41136611 rs73427293  
6 41136486 rs57108243  
6 41136418 rs73427291  
6 41136367 rs114504803  
6 41136086 rs73427289  
6 41135850 rs7759295  
6 41135429 rs57878941  
6 41134337 rs61331691  
6 41134272 rs57922857  
6 41134189 rs78233698  
6 41134139 rs146843590  
6 41133859 rs57912127  
6 41133806 rs7748777  
6 41133743 rs139503432  
6 41133522 rs6933067  
6 41133433 rs60112180  
6 41132677 rs58120101  
6 41132215 rs58883296  
6 41132183 rs77752673

6 41132144 rs112285500  
6 41131728 rs2234247  
6 41131055 rs41273764  
6 41130693 rs2234250  
6 41130471 rs74390253  
6 41130294 rs116793844  
6 41130209 rs57488419  
6 41130162 rs59377666  
6 41130059 rs61163257  
6 41130010 rs115361342  
6 41129631 rs61333415  
6 41129394 rs2234251  
6 41129105 rs2234253  
6 41128595 rs73427275  
6 41128437 rs79640267  
6 41128336 rs182640543  
6 41128041 rs114623246  
6 41127972 rs7748513  
6 41127906 rs112455001  
6 41127897 rs115121185  
6 41127502 rs150598166  
6 41127158 rs185963158  
6 41126956 rs58443802  
6 41126832 rs138996393  
6 41126655 rs2234256  
6 41126429 rs2234258  
6 41125612 rs73427270  
6 41125376 rs147805660  
6 41125222 rs116073837  
6 41124740 rs73427267  
6 41124301 rs145040924  
6 41123396 rs59316704  
6 41123253 rs57292186  
6 41123175 rs75799697  
6 41122919 rs114902951  
6 41122257 rs73733366  
6 41121704 rs147082700  
6 41121280 rs116515123  
6 41121097 rs62396353  
6 41121034 rs62396352  
6 41120733 rs150928821  
6 41119520 rs62396351

6 41119354 rs183395418  
6 41117824 rs45537633  
6 41117586 rs34254490  
6 41116774 rs12194477  
6 41116168 rs150292417  
6 41115299 rs73427265  
6 41114550 rs73427262  
6 41113920 rs72856298  
6 41113812 rs116233858  
6 41113528 rs62396348  
6 41113377 rs62396347  
6 41112019 rs114412740  
6 41111492 rs62396346  
6 41111302 rs62396345  
6 41111281 rs62396344  
6 41111039 rs79595986  
6 41110819 rs75001201  
6 41110561 rs143508049  
6 41110370 rs116748189  
6 41110260 rs115277107  
6 41109864 rs62396343  
6 41109048 rs146527119  
6 41108959 rs150345929  
6 41108771 rs76258518  
6 41108741 rs116418058  
6 41108003 rs142875265  
6 41107828 rs72856293  
6 41107337 rs144646360  
6 41107070 rs147329405  
6 41106855 rs62396342  
6 41106543 rs62396341

---
